# Supplementary material for: A nanophase material and organic dye modified colorimetric sensor array for the discrimination of baijiu
Source: Royal Society of Chemistry journal article supplement (doi:10.1039/c8ay02108b), 2018-01-01
Supplement: c8ay02108b1.pdf [file c8ay02108b1.pdf]

# **A Nanophase Materials and Organic Dye modified Colorimetric Sensor Array for The Discrimination of Baijiu**

Jia Zheng<sup>1,#</sup>, Ping Yang<sup>1,2,#</sup>, Jiawei Li<sup>1</sup>, Pan Li<sup>1</sup>, Jingzhou Hou<sup>3</sup>, Danqun Huo<sup>1,\*</sup>, Changjun Hou<sup>1,\*</sup>, Suyi Zhang<sup>1,2</sup>

<sup>1</sup>Key Laboratory for Biorheological Science and Technology of Ministry of Education, State and Local Joint Engineering Laboratory for Vascular Implants, Bioengineering College of Chongqing University, Chongqing 400044, PR China

<sup>2</sup>National Engineering Research Center of Solid-State Brewing, Luzhou Laojiao Group Co. Ltd., Luzhou 646000, PR China

<sup>3</sup>Liquor Making Biology Technology and Application of Key Laboratory of Sichuan Province, College of Bioengineering, Sichuan University of Science and Engineering, Zigong, 643000, PR China

#These 2 authors made equal contrition to this work.

\* Corresponding author. Tel.: +86 23 6511 2673; fax: +86 23 6510 2507.

E-mail addresses: [houcj@cqu.edu.cn](mailto:houcj@cqu.edu.cn) (C. Hou)

[huodq23@163.com](mailto:huodq23@163.com) (D. Huo)

13

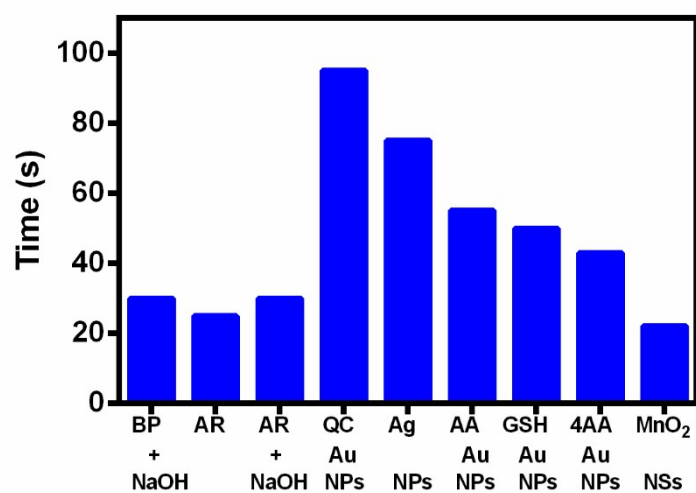

**Fig.S1 Reaction time of different sensor array point**

14

15

16

17

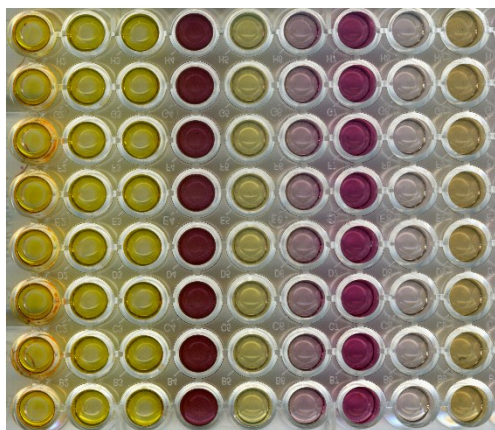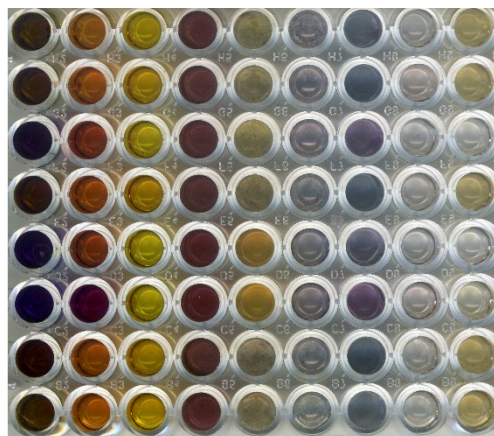

**Fig.S2 HD image of array in before and final reaction**

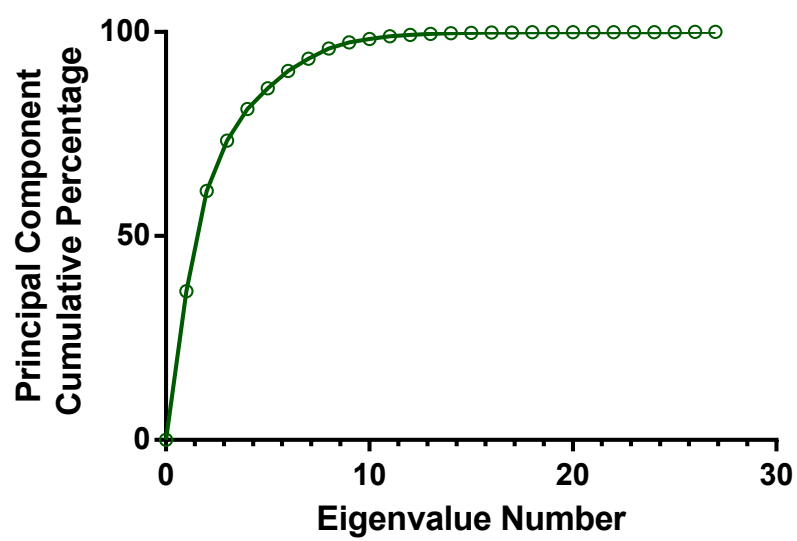

Fig.S3 Principal components of the averaged responses

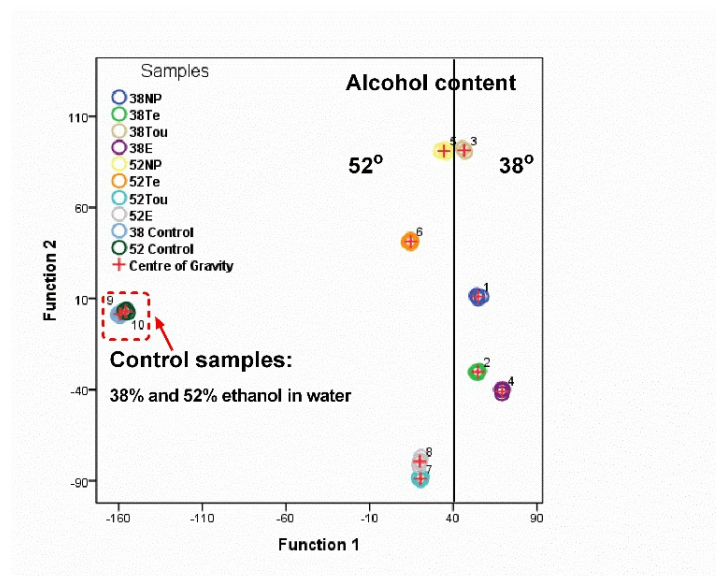

**Fig.S4 Control experiment of 38% and 52% alcohol in water**

# Table.S1

Table S1 Classification results<sup>a,c</sup> for discrimination of the Chinese Base Liquors from Luzhou Laojiao. <sup>a,c</sup>

|                              |       | Samples | Predicted group membership |       |       |       |       |       |       |       | Total |
|------------------------------|-------|---------|----------------------------|-------|-------|-------|-------|-------|-------|-------|-------|
|                              |       |         | 1.00                       | 2.00  | 3.00  | 4.00  | 5.00  | 6.00  | 7.00  | 8.00  |       |
| Original                     | Count | 1.00    | 5                          | 0     | 0     | 0     | 0     | 0     | 0     | 0     | 5     |
|                              |       | 2.00    | 0                          | 5     | 0     | 0     | 0     | 0     | 0     | 0     | 5     |
|                              |       | 3.00    | 0                          | 0     | 5     | 0     | 0     | 0     | 0     | 0     | 5     |
|                              |       | 4.00    | 0                          | 0     | 0     | 5     | 0     | 0     | 0     | 0     | 5     |
|                              |       | 5.00    | 0                          | 0     | 0     | 0     | 5     | 0     | 0     | 0     | 5     |
|                              |       | 6.00    | 0                          | 0     | 0     | 0     | 0     | 5     | 0     | 0     | 5     |
|                              |       | 7.00    | 0                          | 0     | 0     | 0     | 0     | 0     | 5     | 0     | 5     |
|                              |       | 8.00    | 0                          | 0     | 0     | 0     | 0     | 0     | 0     | 5     | 5     |
|                              | %     | 1.00    | 100.0                      | .0    | .0    | .0    | .0    | .0    | .0    | .0    | 100.0 |
|                              |       | 2.00    | .0                         | 100.0 | .0    | .0    | .0    | .0    | .0    | .0    | 100.0 |
|                              |       | 3.00    | .0                         | .0    | 100.0 | .0    | .0    | .0    | .0    | .0    | 100.0 |
|                              |       | 4.00    | .0                         | .0    | .0    | 100.0 | .0    | .0    | .0    | .0    | 100.0 |
|                              |       | 5.00    | .0                         | .0    | .0    | .0    | 100.0 | .0    | .0    | .0    | 100.0 |
|                              |       | 6.00    | .0                         | .0    | .0    | .0    | .0    | 100.0 | .0    | .0    | 100.0 |
|                              |       | 7.00    | .0                         | .0    | .0    | .0    | .0    | .0    | 100.0 | .0    | 100.0 |
|                              |       | 8.00    | .0                         | .0    | .0    | .0    | .0    | .0    | .0    | 100.0 | 100.0 |
| Cross-validated <sup>b</sup> | Count | 1.00    | 5                          | 0     | 0     | 0     | 0     | 0     | 0     | 0     | 5     |
|                              |       | 2.00    | 0                          | 5     | 0     | 0     | 0     | 0     | 0     | 0     | 5     |
|                              |       | 3.00    | 0                          | 0     | 5     | 0     | 0     | 0     | 0     | 0     | 5     |

|   |      |       |       |       |       |       |       |       |       |       |
|---|------|-------|-------|-------|-------|-------|-------|-------|-------|-------|
|   | 4.00 | 0     | 0     | 0     | 5     | 0     | 0     | 0     | 0     | 5     |
|   | 5.00 | 0     | 0     | 0     | 0     | 5     | 0     | 0     | 0     | 5     |
|   | 6.00 | 0     | 0     | 0     | 0     | 0     | 5     | 0     | 0     | 5     |
|   | 7.00 | 0     | 0     | 0     | 0     | 0     | 0     | 5     | 0     | 5     |
|   | 8.00 | 0     | 0     | 0     | 0     | 0     | 0     | 0     | 5     | 5     |
| % | 1.00 | 100.0 | .0    | .0    | .0    | .0    | .0    | .0    | .0    | 100.0 |
|   | 2.00 | .0    | 100.0 | .0    | .0    | .0    | .0    | .0    | .0    | 100.0 |
|   | 3.00 | .0    | .0    | 100.0 | .0    | .0    | .0    | .0    | .0    | 100.0 |
|   | 4.00 | .0    | .0    | .0    | 100.0 | .0    | .0    | .0    | .0    | 100.0 |
|   | 5.00 | .0    | .0    | .0    | .0    | 100.0 | .0    | .0    | .0    | 100.0 |
|   | 6.00 | .0    | .0    | .0    | .0    | .0    | 100.0 | .0    | .0    | 100.0 |
|   | 7.00 | .0    | .0    | .0    | .0    | .0    | .0    | 100.0 | .0    | 100.0 |
|   | 8.00 | .0    | .0    | .0    | .0    | .0    | .0    | .0    | 100.0 | 100.0 |

<sup>a</sup>100% of original grouped cases correctly classified.

<sup>b</sup>Cross validation is done only for those cases in the analysis. In cross validation, each case is classified by the functions derived from all cases other than that case.

<sup>c</sup>100% of cross-validated grouped cases correctly classified.
